# Supplementary material for: Determination of baclofen and vigabatrin by microchip electrophoresis with fluorescence detection: application of field-enhanced sample stacking and dynamic pH junction
Source: Royal Society of Chemistry journal article supplement (doi:10.1039/c8nj00829a), 2018-01-01
Supplement: c8nj00829a1.pdf [file c8nj00829a1.pdf]

### Supplementary Information

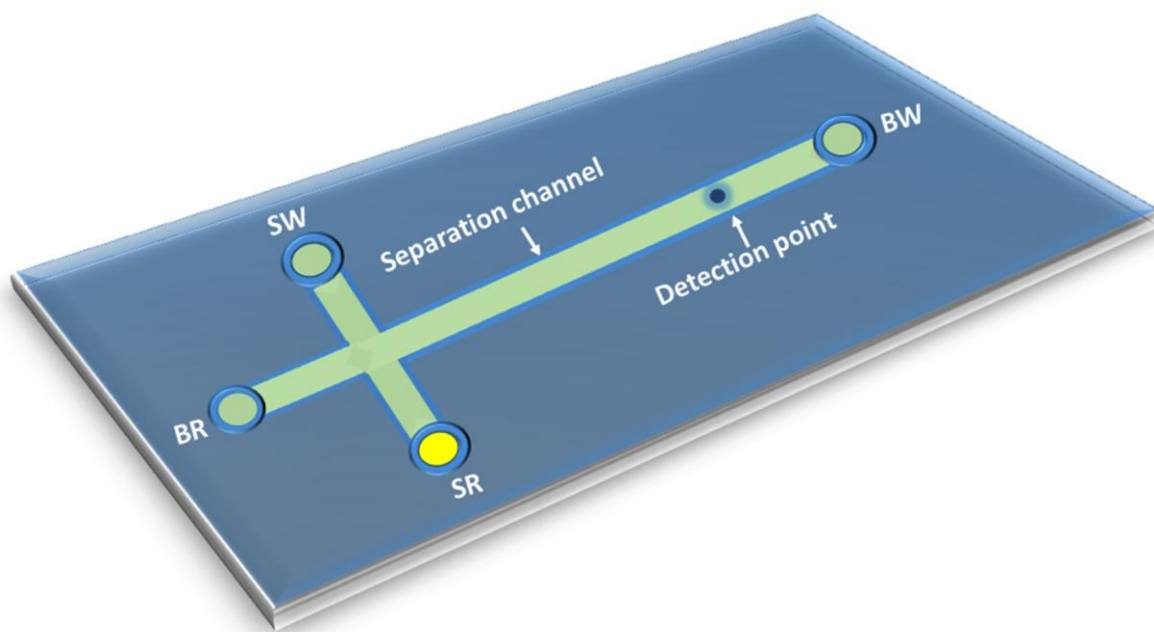

**Figure S1** Schematic of PMMA microchip with T-shaped microfluidic channels, where; BR: buffer reservoir, BW: buffer waste reservoir, SR: sample reservoir, SW: sample waste reservoir.

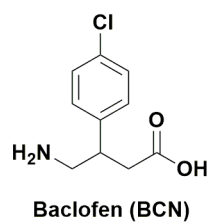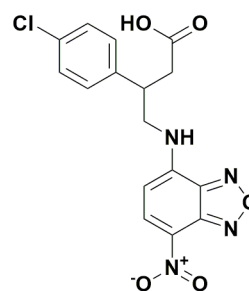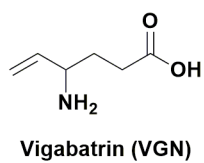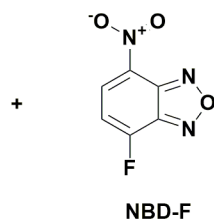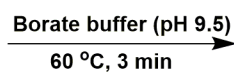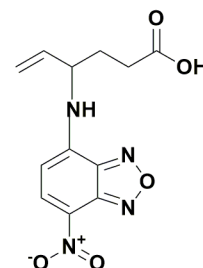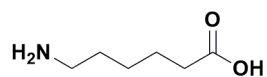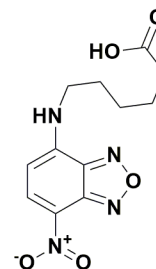

Fluorescently NBD-labelled compounds

**Figure S2** Reaction pathways of NBD-F with baclofen (BCN), vigabatrin (VGN) and 6-aminohexanoic acid (AHA) internal standard.

**Table S1** Electrophoretic loading and separation potentials.

| <b>Reservoir</b>            | <b>SR</b> | <b>SW</b> | <b>BR</b> | <b>BW</b> |
|-----------------------------|-----------|-----------|-----------|-----------|
| <b>Loading potential</b>    | 0.0 V     | 300.0 V   | 0.0 V     | 0.0 V     |
| <b>Separation potential</b> | 130.0 V   | 130.0 V   | 0.0 V     | 750.0 V   |

- SR: Sample reservoir. – SW: Sample waste reservoir. – BR: Buffer reservoir. – BW: Buffer waste reservoir.

**Table S2** Precision data of the proposed method for the determination of the studied drugs in raw materials.

| <b>Concentration added<br/>(ng mL<sup>-1</sup>)</b> | <b>% Found<sup>a</sup></b> |         |        | <b>% RSD</b> |       |      | <b>% Error</b> |       |      |
|-----------------------------------------------------|----------------------------|---------|--------|--------------|-------|------|----------------|-------|------|
| <b>VGN</b>                                          |                            |         |        |              |       |      |                |       |      |
| <b>Intraday (20, 40, 80)</b>                        | 102.18,                    | 99.07,  | 100.36 | 0.31,        | 2.11, | 3.53 | 0.18,          | 1.23, | 2.03 |
| <b>Intraday (20, 40, 80)</b>                        | 100.24,                    | 99.95,  | 99.07  | 3.14,        | 2.85, | 2.36 | 1.81,          | 1.64, | 1.36 |
| <b>BCN</b>                                          |                            |         |        |              |       |      |                |       |      |
| <b>Intraday (20, 40, 80)</b>                        | 100.34,                    | 98.99,  | 101.85 | 2.04,        | 3.13, | 1.62 | 1.18,          | 1.81, | 0.93 |
| <b>Intraday (20, 40, 80)</b>                        | 101.24,                    | 101.18, | 98.35  | 1.35,        | 0.91, | 2.38 | 0.78,          | 0.53, | 1.37 |

<sup>a</sup>Each result is the mean of % of three determinations of three different preparations of the same concentration in three replicate determinations for each preparation.

**Table S3** Application of the proposed MCE method to the determination of the studied drugs in their pharmaceutical tablets.

| Pharmaceutical Preparation       | Drug concentration (ng mL <sup>-1</sup> ) | % Recovery <sup>a</sup> |
|----------------------------------|-------------------------------------------|-------------------------|
| <b>Sabril® 500<br/>Tablets</b>   | 25.0                                      | 103.34                  |
|                                  | 50.0                                      | 101.16                  |
|                                  | 75.0                                      | 102.6                   |
| <b>Mean ± SD</b>                 |                                           | 102.37 ± 1.11           |
| <b>% RSD</b>                     |                                           | 1.08                    |
| <b>% Error</b>                   |                                           | 0.63                    |
| <b>Baclofen® 25<br/>Capsules</b> | 25.0                                      | 97.83                   |
|                                  | 50.0                                      | 103.61                  |
|                                  | 75.0                                      | 98.49                   |
| <b>Mean ± SD</b>                 |                                           | 99.85 ± 2.95            |
| <b>% RSD</b>                     |                                           | 2.96                    |
| <b>% Error</b>                   |                                           | 1.71                    |

<sup>a</sup>Each result is the average of three separate determinations.

**Table S4** Results of the standard addition technique for the determination of VGN and BCN in their pharmaceutical tablets by MCE.

| Pharmaceutical Preparation     | Concentration Added <sup>a</sup>                  | Concentration (ng mL <sup>-1</sup> ) | % Recovery    |
|--------------------------------|---------------------------------------------------|--------------------------------------|---------------|
| <b>Sabril® 500<br/>Tablets</b> | 0.0, 5.0, 10.0, 15.0, 20.0<br>ng mL <sup>-1</sup> | <b>VGN</b>                           | <b>VGN</b>    |
|                                |                                                   | 20.0                                 | 99.18         |
|                                |                                                   | 40.0                                 | 103.72        |
|                                |                                                   | 60.0                                 | 103.34        |
|                                | <b>Mean ± SD</b>                                  |                                      | 102.08 ± 2.52 |
|                                | <b>% RSD</b>                                      |                                      | 2.47          |
| <b>% Error</b>                 |                                                   | 1.43                                 |               |
| <b>Baclofen® 25 tablets</b>    | 0.0, 5.0, 10.0, 15.0, 20.0<br>ng mL <sup>-1</sup> | <b>BCN</b>                           | <b>BCN</b>    |
|                                |                                                   | 20.0                                 | 101.94        |
|                                |                                                   | 40.0                                 | 104.17        |
|                                |                                                   | 60.0                                 | 103.26        |
|                                | <b>Mean ± SD</b>                                  |                                      | 103.12 ± 1.12 |
|                                | <b>% RSD</b>                                      |                                      | 1.09          |
| <b>% Error</b>                 |                                                   | 0.63                                 |               |

<sup>a</sup>Concentrations of each pure standard drug added to the three specific concentrations (20.0, 40.0 and 60.0 ng mL<sup>-1</sup>) of each pharmaceutical formulation extract.

**Table S5** Validation data for the determination of baclofen (BCN) in spiked human plasma and urine samples by the proposed MCE method.

| Drug | Matrix       | Spiked Conc. (ng mL <sup>-1</sup> ) | Final Conc. (ng mL <sup>-1</sup> ) | Accuracy % <sup>a</sup> | Precision (% RSD)     |                       |
|------|--------------|-------------------------------------|------------------------------------|-------------------------|-----------------------|-----------------------|
|      |              |                                     |                                    |                         | Intraday <sup>b</sup> | Interday <sup>c</sup> |
| BCN  | Human plasma | 100.0                               | 1.0                                | 97.36                   | 5.71                  | 6.41                  |
|      |              | 200.0                               | 2.0                                | 99.52                   | 3.67                  | 3.48                  |
|      |              | 500.0                               | 5.0                                | 102.90                  | 4.59                  | 5.74                  |
| BCN  | Human urine  | 100.0                               | 1.0                                | 95.04                   | 2.41                  | 4.23                  |
|      |              | 200.0                               | 2.0                                | 98.17                   | 6.05                  | 5.23                  |
|      |              | 500.0                               | 5.0                                | 95.34                   | 4.29                  | 5.98                  |

<sup>a</sup> % Accuracy was calculated as the mean % recovered where n=5. <sup>b</sup> Intraday precision was measured as %RSD where n=5 on one day. <sup>c</sup> Interday precision was measured as %RSD where n=5 on five different days.

**Table S6** Application of the developed MCE method for the simultaneous estimation of VGN and BCN in their laboratory-prepared mixtures.

| Item                              | Concentration taken (ng mL <sup>-1</sup> ) |      | % Found <sup>a</sup> |               |
|-----------------------------------|--------------------------------------------|------|----------------------|---------------|
|                                   | VGN                                        | BCN  | VGN                  | BCN           |
| VGN and BCN binary mixture (1:1)  | 10.0                                       | 10.0 | 99.37                | 100.83        |
|                                   | 20.0                                       | 20.0 | 97.61                | 101.17        |
|                                   | 40.0                                       | 40.0 | 102.01               | 97.24         |
|                                   | 60.0                                       | 60.0 | 98.72                | 103.81        |
|                                   | 80.0                                       | 80.0 | 102.54               | 103.15        |
| Mean ± SD                         |                                            |      | 100.05 ± 2.14        | 101.24 ± 2.57 |
| % RSD                             |                                            |      | 2.13                 | 2.54          |
| % Error                           |                                            |      | 0.95                 | 1.14          |
| VGN and BCN binary mixture (20:1) | 20.0                                       | 1.0  | 102.38               | 96.18         |
|                                   | 40.0                                       | 2.0  | 100.51               | 98.62         |
|                                   | 60.0                                       | 3.0  | 99.86                | 97.91         |
|                                   | 80.0                                       | 4.0  | 101.77               | 101.74        |
|                                   | 100.0                                      | 5.0  | 100.2                | 98.37         |
| Mean ± SD                         |                                            |      | 100.94 ± 1.08        | 98.56 ± 2.02  |
| % RSD                             |                                            |      | 1.07                 | 2.04          |
| % Error                           |                                            |      | 0.48                 | 0.91          |

<sup>a</sup>Each result is the average of three separate determinations.
